# Supplementary material
Source: PubMed Central journal article supplement (PMC443547)
Supplement: nar_32_11_3418__1.pdf [file nar_32_11_3418__1.pdf]

**List of predicted target sites of the 24 HutC/GntR members of *S. coelicolor***

|    | <i>orf</i> | +/- | <i>gene</i> , function                                                   | # | Sequence                                |
|----|------------|-----|--------------------------------------------------------------------------|---|-----------------------------------------|
| 1  | SCO0213    | -   | <i>narK</i> , possible nitrate/nitrite extrusion protein                 | 1 | acacgGTGTACACacgac                      |
| 2  | SCO0214    | +   | Conserved hypothetical protein                                           | 1 | CggcaGTgTAGACatggG                      |
| 3  | SCO0676    | +   | Possible integral membrane sensor protein                                | 1 | GtttGGTCTAGACCgcgC                      |
| 4  | SCO1117    | -   | Possible secreted protein                                                | 1 | cCtccGTGTACACTcgGc                      |
| 5  | SCO1166    | -   | putative integral membrane protein                                       | 1 | cCtccGTGTACACTcgGc                      |
| 6  | SCO1167    | +   | putative helicase (fragment)                                             | 1 | cCtccGTGTACACTcgGc                      |
| 7  | SCO1373    | -   | conserved hypothetical oxidoreductase protein                            | 1 | atGtcGTaTAaACTcCgc                      |
| 8  | SCO1374    | +   | putative secreted protein                                                | 1 | atGtcGTaTAaACTcCgc                      |
| 9  | SCO1390    | +   | <i>orr</i> , PTS system sugar phosphotransferase component IIA           | 1 | gtGtGGTCTAGACCTcta                      |
| 10 | SCO1517    | -   | putative secreted protein                                                | 1 | cGGcgGTGTACACacCCc                      |
| 11 | SCO1547    | -   | putative anthranilate synthase, chorismate binding enzyme                | 1 | AACCGTgTAGACGGcTT                       |
| 12 | SCO2112    | -   | conserved hypothetical protein                                           | 1 | AcTAAGTCTAGACTTAcT                      |
| 13 | SCO2113    | +   | <i>bfr</i> , probable bacterioferritin                                   | 1 | AcTAAGTCTAGACTTAcT                      |
| 14 | SCO2182    | +   | GntR family transcriptional regulator                                    | 1 | gTattGTcTAaACgtcAg                      |
| 15 | SCO2833    | -   | <i>chb</i> , secreted chitin binding protein                             | 1 | acttGGTCTAGACCTgca                      |
| 16 | SCO2905    | -   | <i>malX2</i> , PTS enzyme EIIB specific for N-acetyl- glucosamine uptake | 1 | GTcaACTGGTcTAaACCAGTgtAC                |
| 17 | SCO2906    | +   | <i>nagE1</i> , PTS transmembrane and sugar-binding component EIIC        | 1 | GTcaACTGGTcTAaACCAGTgtAC                |
| 18 | SCO2907    | +   | <i>nagE2</i> , PTS transmembrane component EIIC                          | 2 | aAcaGGTcTAaACCacTg<br>GaGTGGTgTAGACCCaC |
| 19 | SCO3207    | -   | Putative tetR-family transcriptional regulator                           | 1 | caCagGTcTAaACggGga                      |
| 20 | SCO3208    | +   | putative secreted protein                                                | 1 | caCagGTcTAaACggGga                      |
| 21 | SCO3366    | -   | putative efflux permease                                                 | 1 | aagtGTcTAaACTggga                       |
| 22 | SCO3367    | +   | putative tetR-family regulator                                           | 1 | aagtGTcTAaACTggga                       |
| 23 | SCO3563    | +   | <i>acsA</i> , acetyl-coenzyme A synthetase                               | 1 | AaCaGGTcTAaACCAtTT                      |
| 24 | SCO3655    | -   | putative spermidine synthase                                             | 1 | gAaccGTaTAaACCctGtG                     |
| 25 | SCO3711    | +   | putative small membrane protein                                          | 1 | CcGtCGTcTAaACGgCcG                      |
| 26 | SCO4285    | -   | possible sugar kinase                                                    | 1 | cggTGGTgTAGACttaa                       |
| 27 | SCO4286    | +   | putative solute-binding protein                                          | 1 | cggTGGTgTAGACttaa                       |
| 28 | SCO4630    | -   | hypothetical protein                                                     | 1 | taGgCGTcTAaACGgCag                      |
| 29 | SCO5036    | -   | Unknown ABC transpoter system operon                                     | 1 | ggtgcGTaTAaACcgtgt                      |
| 30 | SCO5159    | -   | putative integral membrane transport protein                             | 1 | ggtgcGTaTAaACcgtgt                      |
| 31 | SCO5160    | +   | hypothetical protein                                                     | 1 | ttggcGTaTAaACatagt                      |
| 32 | SCO5231    | -   | <i>dasR</i> , GntR-family transcriptional regulator                      | 1 | tAcTGGTcTAaACCAtTg                      |
| 33 | SCO5232    | +   | <i>dasA</i> , possible sugar transporter sugar binding protein           | 1 | tAcTGGTcTAaACCAtTg                      |
| 34 | SCO5236    | -   | <i>nagB</i> , glucosamine phosphate isomerase                            | 1 | gATTGGTcTAaACCacATa                     |
| 35 | SCO5240    | -   | <i>wblE</i> , hypothetical protein                                       | 1 | cgaaCGTcTAGACcagga                      |
| 36 | SCO5749    | +   | two-component regulator                                                  | 1 | ggtGTgTAaACggcgg                        |
| 37 | SCO5841    | -   | <i>ptsH</i> , phosphocarrier protein hpr                                 | 1 | aAgTtGTCTAGACcAgTc                      |
| 38 | SCO5842    | +   | conserved hypothetical protein                                           | 2 | gtCTtGTCTAGACcAGtt                      |
| 39 | SCO5976    | +   | <i>arcB</i> , ornithine carbamoyltransferase                             | 1 | aGttcGTaTAGACTtcCa                      |
| 40 | SCO6032    | -   | putative hydrolase, possible beta-hexosaminidase                         | 1 | tCTTGGTcTAaACCAGg                       |
| 41 | SCO6033    | +   | hypothetical protein                                                     | 1 | tCTTGGTcTAaACCAGg                       |
| 42 | SCO6062    | +   | putative ABC transporter ATP-binding subunit                             | 1 | cagccGTcTAaACTcgac                      |
| 43 | SCO6178    | -   | <i>nodB</i> putative chitoooligosaccharide deacetylase                   | 1 | tgCGtGTATATACgCGgt                      |
| 44 | SCO6179    | +   | putative nucleotide-sugar dehydratase                                    | 1 | tgCGtGTATATACgCGgt                      |
| 45 | SCO6214    | +   | putative permease                                                        | 1 | CcGaCGTcTAaACGaCcG                      |
| 46 | SCO6222    | -   | putative aminotransferase class-I                                        | 1 | AacttGTcTAaACTgcgT                      |
| 47 | SCO6223    | +   | conserved hypothetical protein                                           | 1 | AacttGTcTAaACTgcgT                      |
| 48 | SCO6300    | -   | putative secreted hydrolase, possible beta-hexosaminidase                | 1 | AttttGTCTAGACctctT                      |
| 49 | SCO6344    | -   | putative secreted amidase                                                | 1 | ctaAGGTCTAGACCTgca                      |
| 50 | SCO6345    | +   | possible secreted chitinase                                              | 2 | CGTAGGTCTAGACCTgCG                      |
| 51 | SCO6445    | +   | putative inositol monophosphatase                                        | 1 | caCgcGTGTACACctGat                      |
| 52 | SCO6925    | -   | putative membrane protein                                                | 1 | TgCctGTATATACgCgTA                      |
| 53 | SCO6926    | +   | hypothetical protein                                                     | 1 | TgCctGTATATACgCgTA                      |
| 54 | SCO7017    | -   | hypothetical protein                                                     | 1 | cgAGCGTGTACACCTgC                       |
| 55 | SCO7018    | +   | hypothetical protein                                                     | 1 | cgAGCGTGTACACCTgC                       |
| 56 | SCO7056    | -   | GntR-family transcriptional regulator                                    | 1 | agcTGGTcTAGACCAatg                      |
| 57 | SCO7224    | -   | putative integral membrane protein                                       | 1 | cccTtGTCTAGACcAata                      |
| 58 | SCO7225    | +   | secreted chitinase                                                       | 2 | cTatGGTCTAGACCTgAa                      |
|    |            |     |                                                                          | 3 | gtCAGGTCTAGACCTGta                      |
| 59 | SCO7263    | +   | <i>chiF</i> , chitinase                                                  | 1 | aActGGTcTAaACCctTg                      |
| 60 | SCO7290    | -   | putative dehydrogenase                                                   | 1 | gCccGTcTAaACCctGt                       |
| 61 | SCO7410    | -   | putative binding-protein dependent transport protein                     | 1 | GGcatGTcTAaACTgCcc                      |
| 62 | SCO7411    | +   | putative LacI-family transcriptional regulator                           | 1 | GGcatGTcTAaACTgCcc                      |
